# Supplementary material for: Mapping the landscape of genetic dependencies in chordoma
Source: PubMed Central journal article supplement (PMC10079670; doi:10.1038/s41467-023-37593-8), 2023-04-06
Supplement: 41467_2023_37593_MOESM1_ESM.pdf [file 41467_2023_37593_MOESM1_ESM.pdf]

## **SUPPLEMENTARY INFORMATION**

**Mapping the landscape of genetic dependencies in chordoma**

**Sharifnia, Wawer et al.**

### **Contents**

Supplementary Figures 1-15

Supplementary Tables 1-2

Supplementary Information References

Uncropped immunoblots associated with Supplementary Figure 4

Uncropped immunoblots associated with Supplementary Figure 11

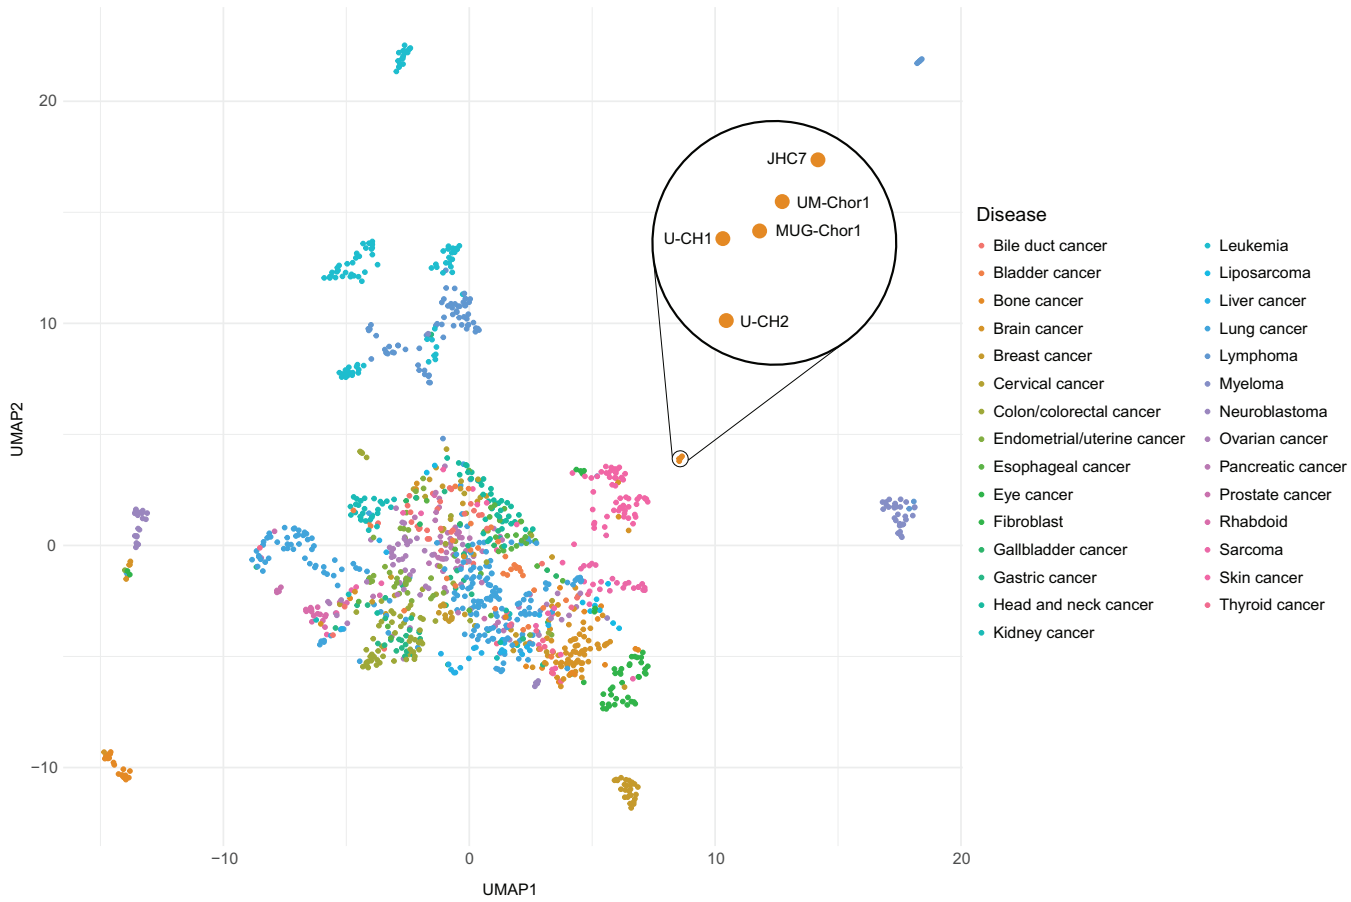

**Supplementary Fig. 1. Similarity of gene-expression profiles of chordoma cell lines used for genome-scale CRISPR-Cas9 screens.** Uniform manifold approximation and projection (UMAP) plot showing that chordoma cell lines form a distinct cluster based on gene-expression profiles generated from chordoma cell lines (including the U-CH1 chordoma cell line, which was not subjected to CRISPR-Cas9 screening) and 1,294 non-chordoma cancer cell lines in the CCLE, colored by lineage annotation. Source data are provided as a Source Data file.

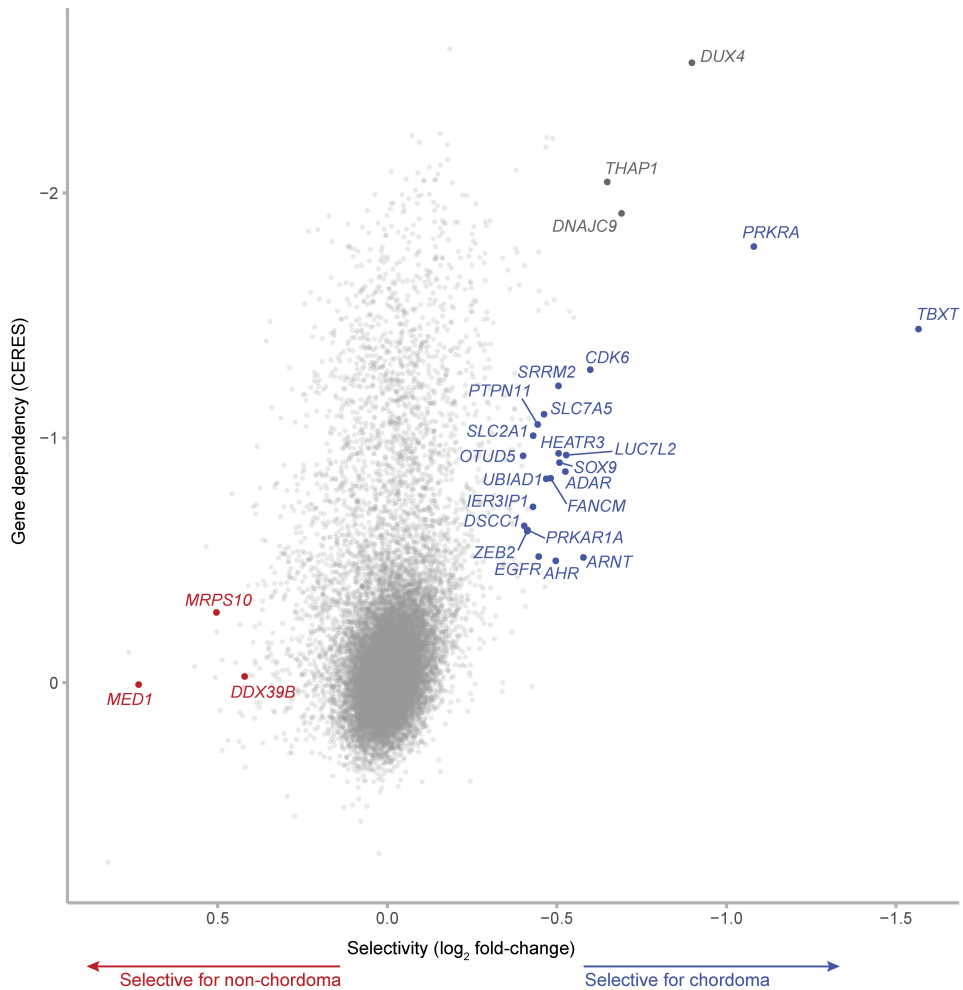

**Supplementary Fig. 2. Genome-scale CRISPR-Cas9 screens identify a spectrum of selectively essential genes in chordoma (CERES analysis).** Selective essentiality analysis identifying chordoma dependency genes. Selectivity is quantified by the  $\log_2$  fold-change in mean CERES gene effect scores between four chordoma and 765 non-chordoma cell lines (x-axis). The y-axis depicts the median CERES gene effect score for the chordoma cell lines. Lower CERES gene effect scores indicate higher dependency of a cell line on a given gene. Gene dependencies selective for chordoma/non-chordoma are indicated in blue/red (see Methods for details). Genes that do not meet the selectivity threshold for dependency probability scores ( $\log_2$  fold-change > 0.3) but are strongly selective for chordoma based on CERES gene effect scores only ( $\log_2$  fold-change > 0.5) are indicated and labeled in dark gray. They represent commonly essential genes that show a higher degree of viability effects in chordoma cell lines compared to non-chordoma cell lines. See also related Supplementary Data 2.

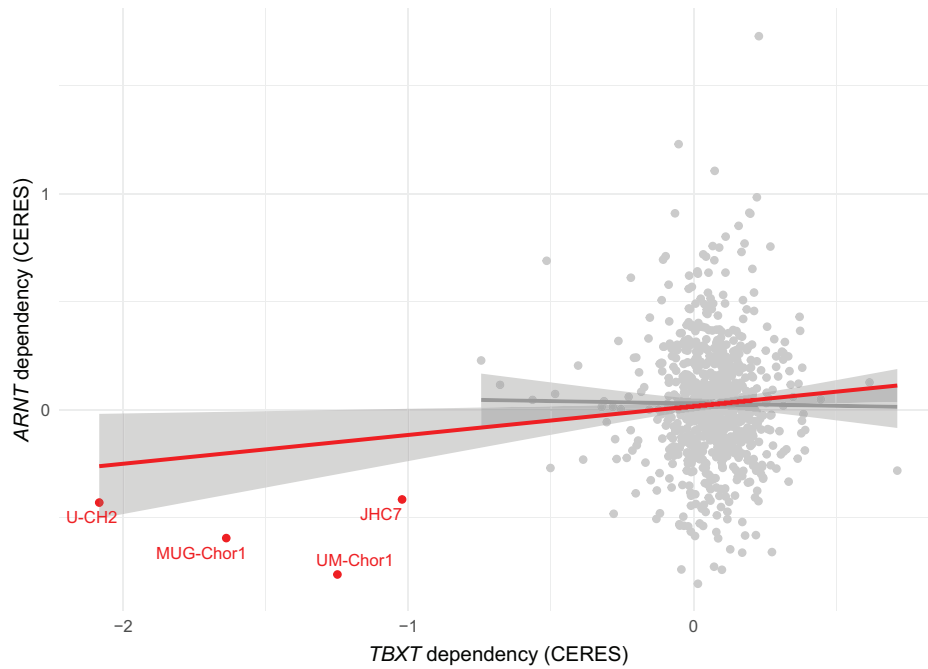

**Supplementary Fig. 3. The correlation between *TBXT* and *ARNT* is driven by chordoma cell lines.** Scatter plot of *TBXT* vs. *ARNT* CERES gene effect scores for all cell lines annotated with both *TBXT* and *ARNT* dependency ( $n = 769$ ). Linear regression models indicate that the relationship between *TBXT* and *ARNT* is significant only when chordoma cell lines are included (red line,  $y = 0.017 + 0.133x$ ,  $P = 0.020$ , derived from a two-tailed, one-sample  $t$  test for the slope coefficient). Without chordoma cell lines, the association is not significant (gray line,  $y = 0.030 - 0.022x$ ,  $P = 0.772$ , derived from a two-tailed, one-sample  $t$  test for the slope coefficient). Gray areas around the regression lines indicate the 95% confidence intervals for each fit. Source data are provided as a Source Data file.



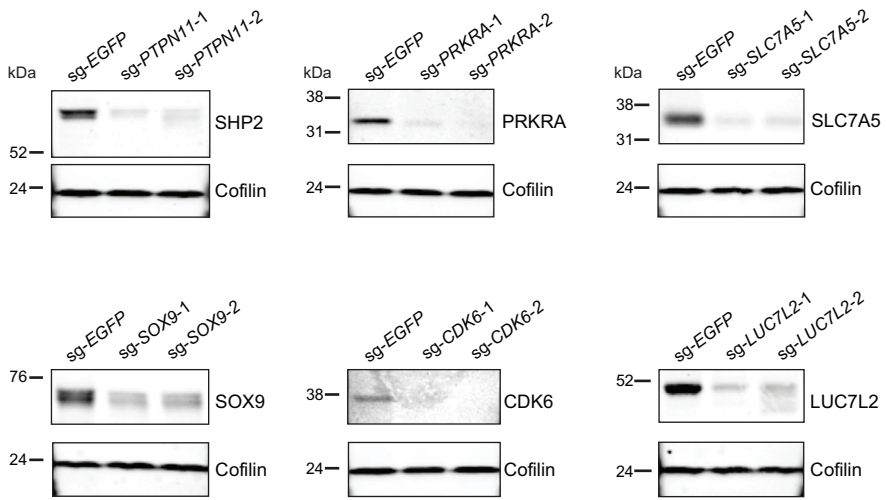

**Supplementary Fig. 4. Immunoblot analysis confirming sgRNA-mediated protein repression.** Immunoblot analysis of Cas9-expressing UM-Chor1 chordoma cells transduced with sgRNAs targeting a candidate dependency gene or a non-targeting sgRNA control.

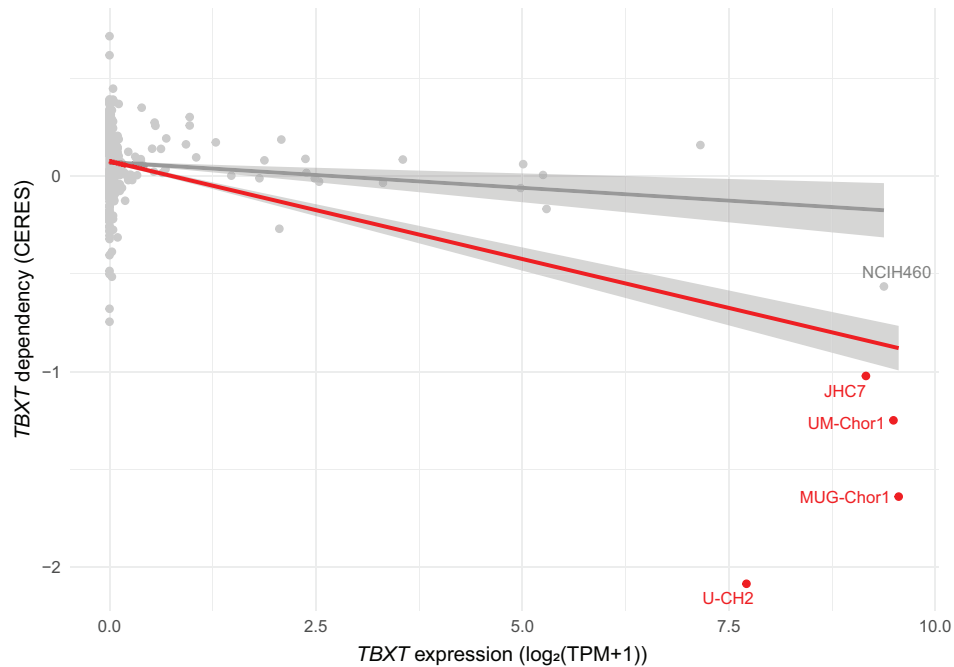

**Supplementary Fig. 5. The correlation between *TBXT* dependency and *TBXT* expression is driven by chordoma cell lines.** Scatter plot of *TBXT* gene expression vs. CERES gene effect scores for all cell lines annotated with both *TBXT* expression and dependency ( $n = 767$ ). Linear regression models indicate that the relationship between *TBXT* dependency and *TBXT* expression is highly significant when chordoma cell lines are included (red line,  $y = 0.075 - 0.100x$ ,  $P = 2.22 \times 10^{-51}$ , derived from a two-tailed, one-sample  $t$  test for the slope coefficient). Without chordoma cell lines, the association is much weaker (gray line,  $y = 0.071 - 0.026x$ ,  $P = 6 \times 10^{-4}$ , derived from a two-tailed, one-sample  $t$  test for the slope coefficient). Additionally omitting NCIH460 (H460), a lung cancer cell line with known *TBXT* expression and dependency<sup>1</sup>, leads to a non-significant association (line not shown,  $y = 0.070 - 0.010x$ ,  $P = 0.255$ , derived from a two-tailed, one-sample  $t$  test for the slope coefficient). Gray areas around the regression lines indicate the 95% confidence intervals for each fit. Source data are provided as a Source Data file.

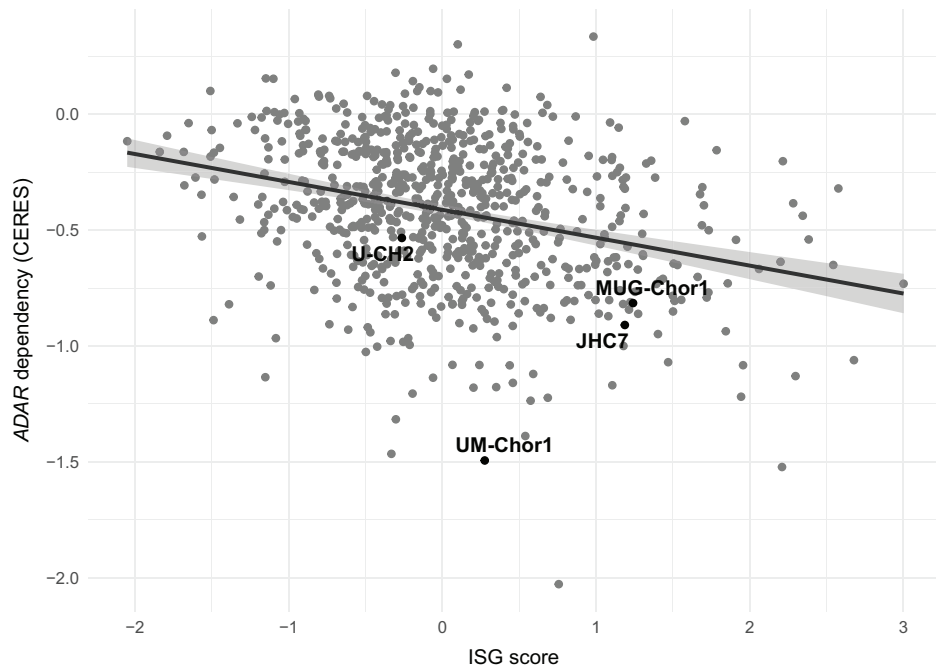

**Supplementary Fig. 6. The ISG score is a predictor of *ADAR* dependency.** Scatter plot of ISG scores vs. *ADAR* CERES gene effect scores for  $n = 767$  cancer cell lines, overlaid with a regression line ( $y = -0.413 - 0.120x$ ,  $P = 9.37 \times 10^{-17}$ , derived from a two-tailed, one-sample  $t$  test for the slope coefficient). Chordoma cell lines are indicated. Gray areas around the regression lines indicate the 95% confidence intervals for each fit. Source data are provided as a Source Data file.

**a**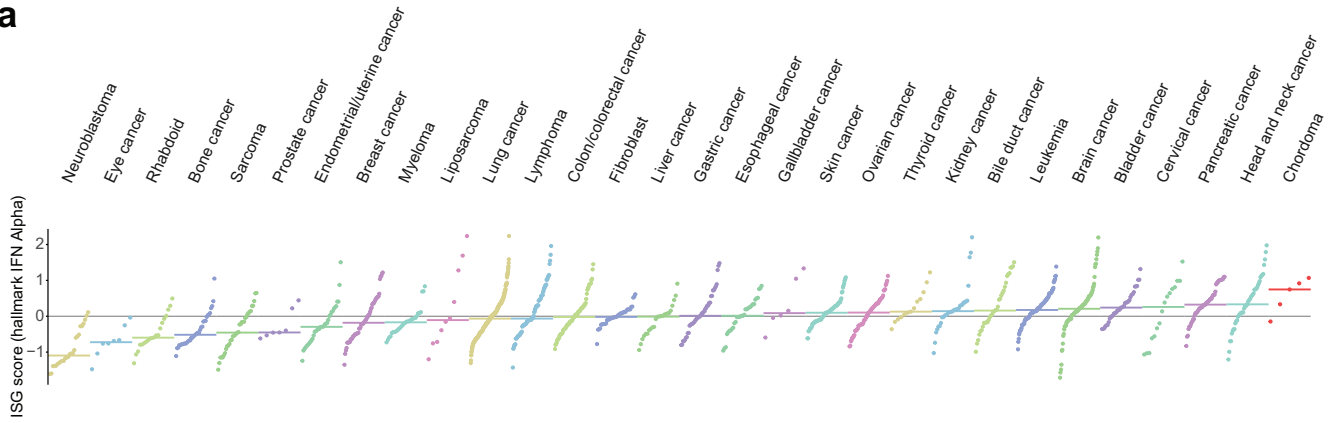**b**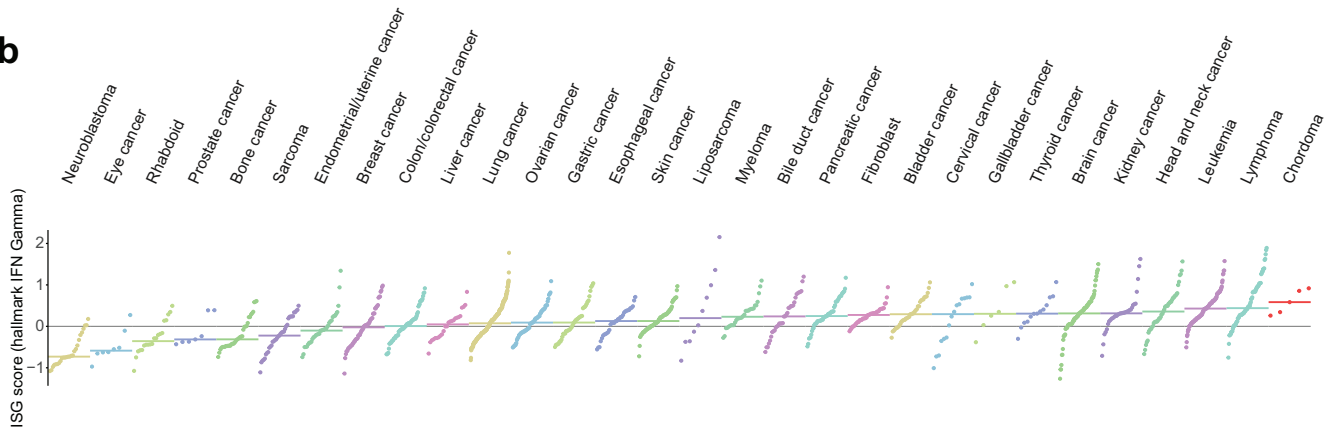

**Supplementary Fig. 7. Alternative gene-set signatures confirm the high levels of interferon-stimulated gene expression in chordoma cell lines.** Plots analogous to the ISG core score calculations depicted in Fig. 4a, using alternative interferon-related gene signatures from MSigDB<sup>2</sup> in place of the 38-gene signature<sup>3</sup>. **a** Distribution of ISG scores calculated with the MSigDB hallmark Interferon Alpha signature for chordoma cell lines and 1,294 non-chordoma cancer cell lines in the CCLE, grouped by lineage annotation. **b** Distribution of ISG scores calculated with the MSigDB hallmark Interferon Gamma signature for chordoma cell lines and 1,294 non-chordoma cancer cell lines in the CCLE, grouped by lineage annotation. Colored horizontal bars: median scores for each group. Gray horizontal line: zero-score mark. Source data are provided as a Source Data file.

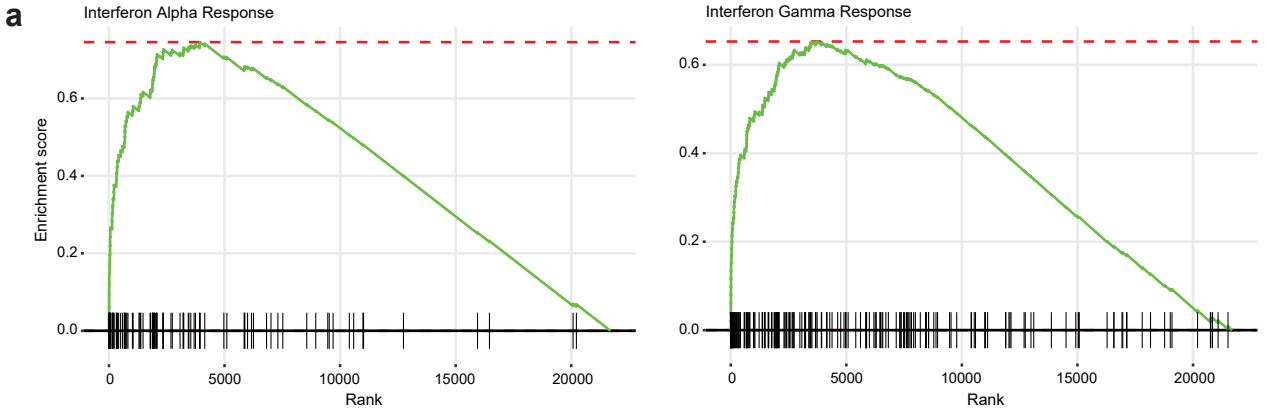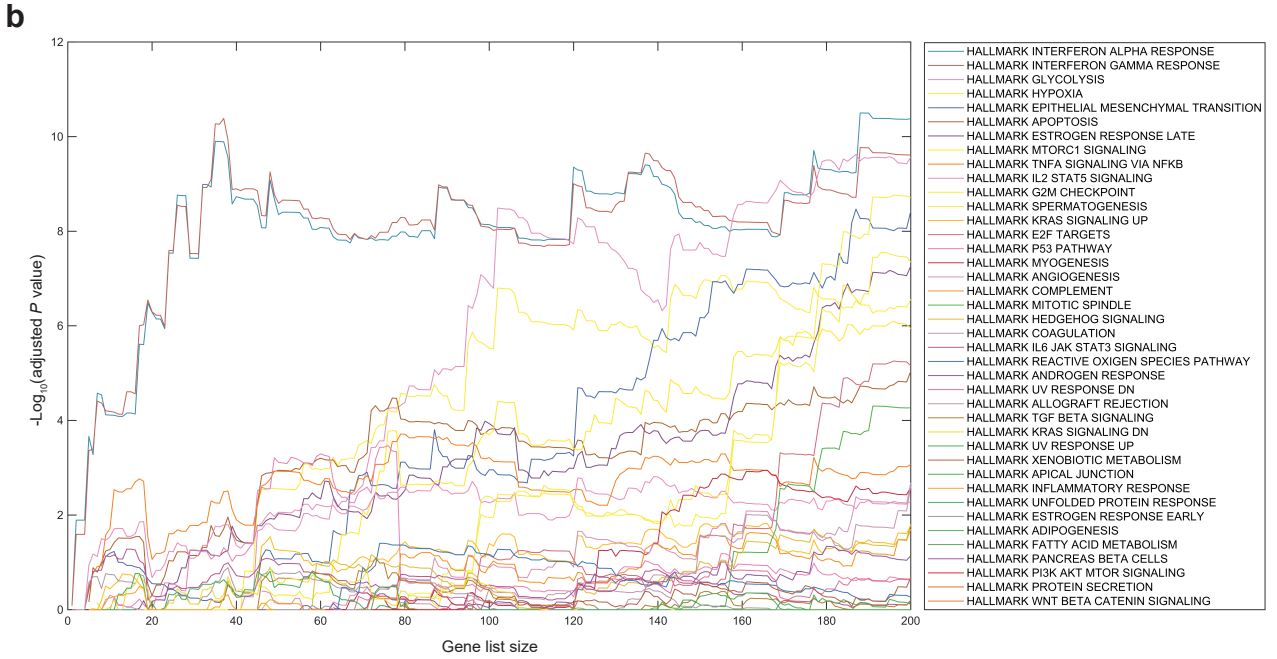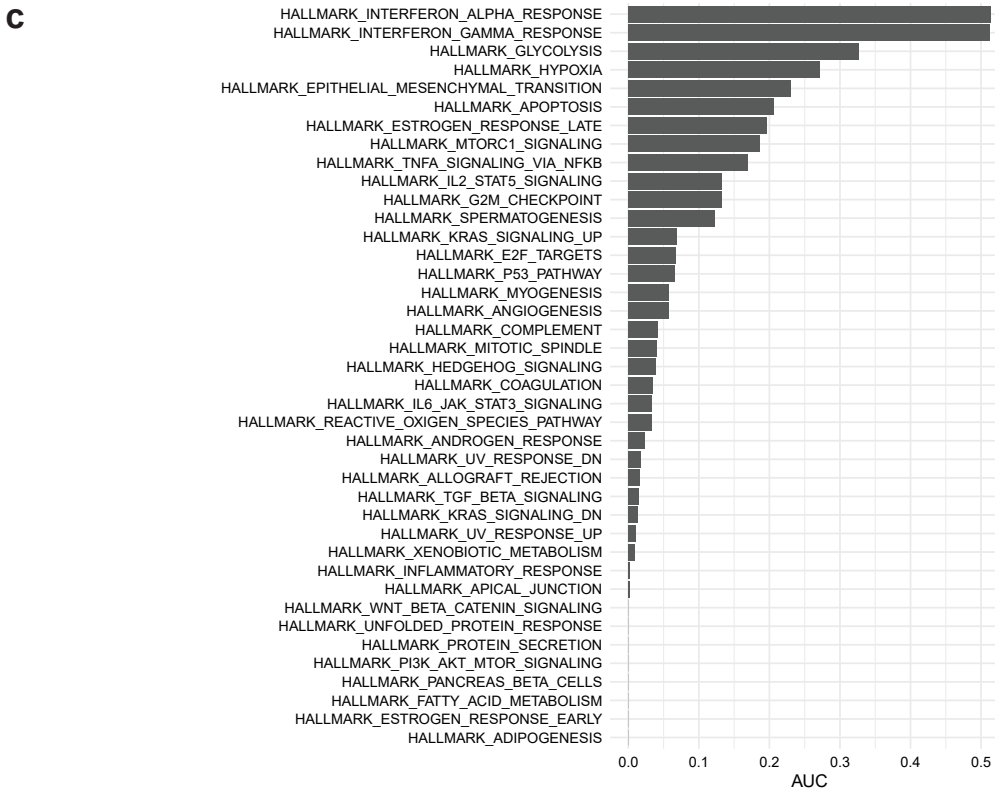

**Supplementary Fig. 8. Interferon alpha and interferon gamma response genes are significantly upregulated following ADAR gene suppression in chordoma.** **a** Gene-set enrichment analysis (GSEA) plots for the two most-enriched gene sets from the hallmark collection, Interferon Alpha (94 genes, enrichment score = 0.75, normalized enrichment score = 2.34, Benjamini-Hochberg-adjusted  $P = 3.84 \times 10^{-18}$ ) and Interferon Gamma (188 genes, enrichment score = 0.65, normalized enrichment score = 2.16, Benjamini-Hochberg-adjusted  $P = 9.53 \times 10^{-20}$ ). **b** Benjamini-Hochberg-adjusted enrichment  $P$  values, derived from GeLiNEA's null model of degree-preserving random gene lists (see Methods), for all tested gene list sizes and gene sets. **c** Area-under-curve (AUC) values for GeLiNEA enrichment results. Source data are provided as a Source Data file. See also related Supplementary Data 4.

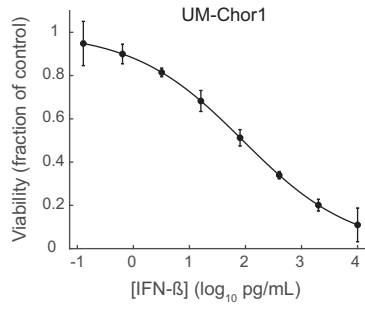

**Supplementary Fig. 9. Chordoma cells are sensitive to IFN-β treatment.** Viability of UM-Chor1 cells treated with indicated concentrations of IFN-β and assayed for cell viability after 6 d with CellTiter-Glo. Response data are represented by a fitted curve to the mean fractional viability at each concentration relative to vehicle-treated cells; error bars represent the s.e.m. ( $n = 5$  biological samples measured in parallel). Source data are provided as a Source Data file.

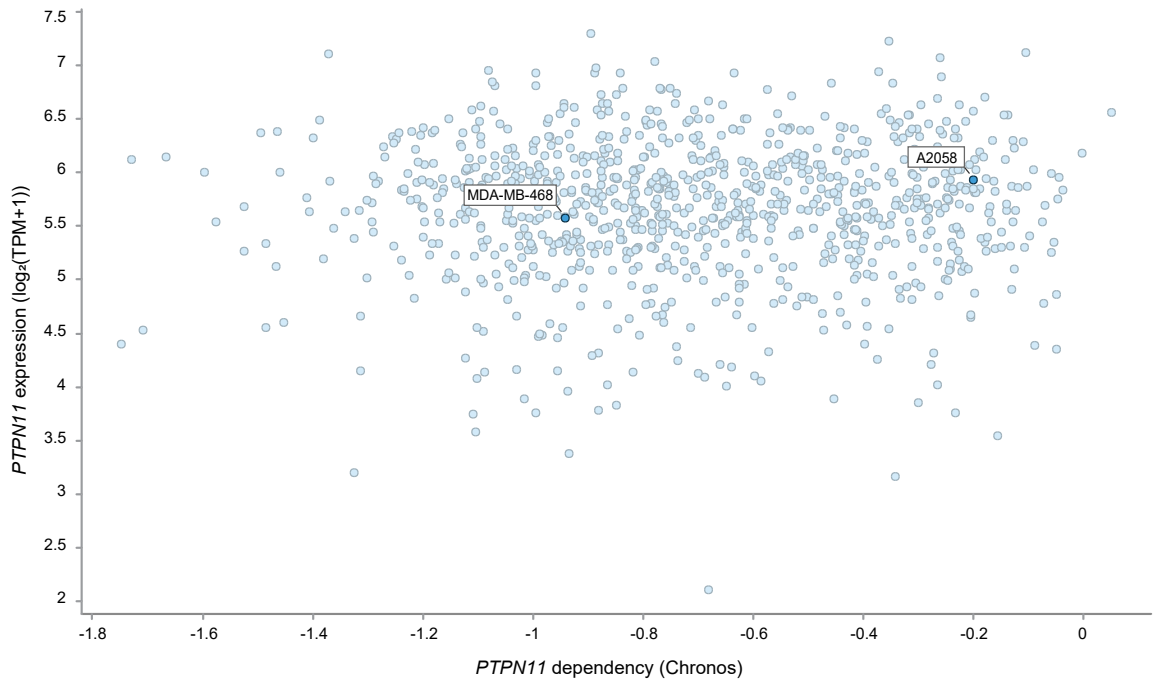

**Supplementary Fig. 10. MDA-MB-468 and A2058 cell lines are sensitive and insensitive to loss of *PTPN11*, respectively.** Data corresponding to *PTPN11* gene effect by CRISPR and *PTPN11* log<sub>2</sub>(TPM+1) expression for 952 cancer cell lines generated as part of the DepMap project. Gene effect is reported as a Chronos score<sup>4</sup>. Source data are provided as a Source Data file.



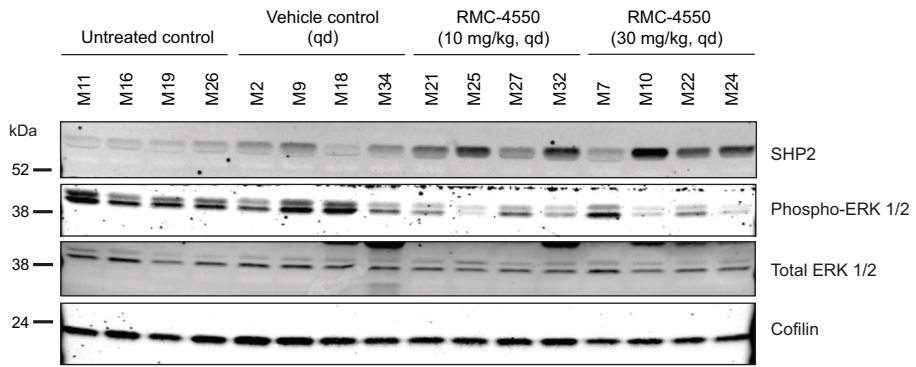

**Supplementary Fig. 11. RMC-4550 treatment can reduce phosphorylation of ERK 1/2 *in vivo*.** Immunoblot analysis of U-CH1 xenograft tumors following treatment with indicated doses of RMC-4550 once daily for 3 d.

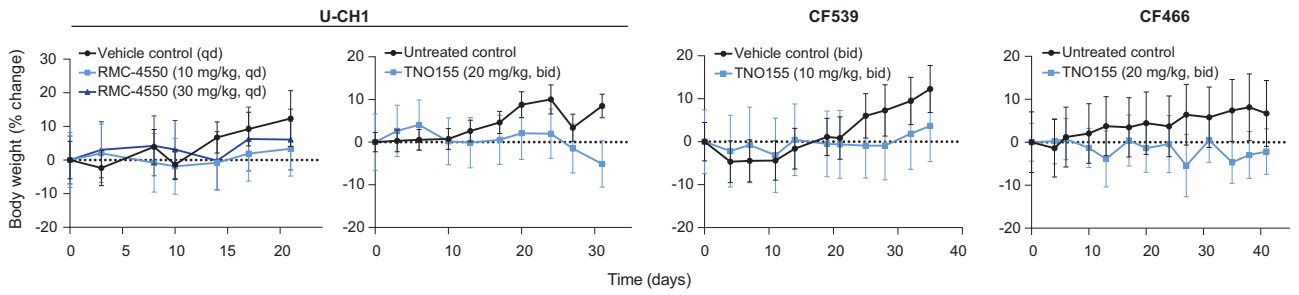

**Supplementary Fig. 12. Tolerability of SHP2 inhibitor-treatment in mouse models of chordoma.** Body weight (percent change relative to day 0 measurement) of mice engrafted with chordoma cells (U-CH1 cell line-derived xenograft, CF539 PDX, or CF466 PDX) and treated with a SHP2 inhibitor (RMC-4550 or TNO155). Points represent the mean body weight percent change  $\pm$  s.e.m. ( $n=4$  (control) or 5 (compound) tumors for each arm of the U-CH1/RMC-4550 study;  $n=6$  (compound) or 7 (control) tumors for each arm of the U-CH1/TNO155 study;  $n=6$  (control) or 7 (compound) tumors for each arm of the CF539 study;  $n=7$  tumors for each arm of the CF466 study). Source data are provided as a Source Data file.

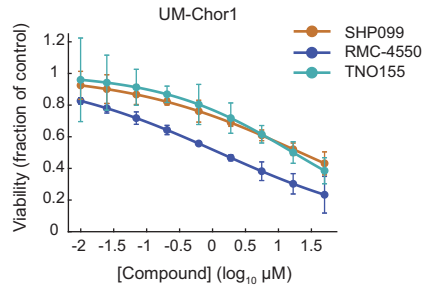

**Supplementary Fig. 13. TNO155 has comparable potency to SHP099 and RMC-4550 in chordoma cells.** Viability of UM-Chor1 cells treated with indicated concentrations of SHP2 inhibitors SHP099, RMC-4550, TNO155, or vehicle and assayed for cell viability after 6 d with CellTiter-Glo. Response data are represented by a fitted curve to the mean fractional viability at each concentration relative to vehicle-treated cells; error bars represent the s.e.m. ( $n = 4$  biological samples measured in parallel). Source data are provided as a Source Data file.

**a**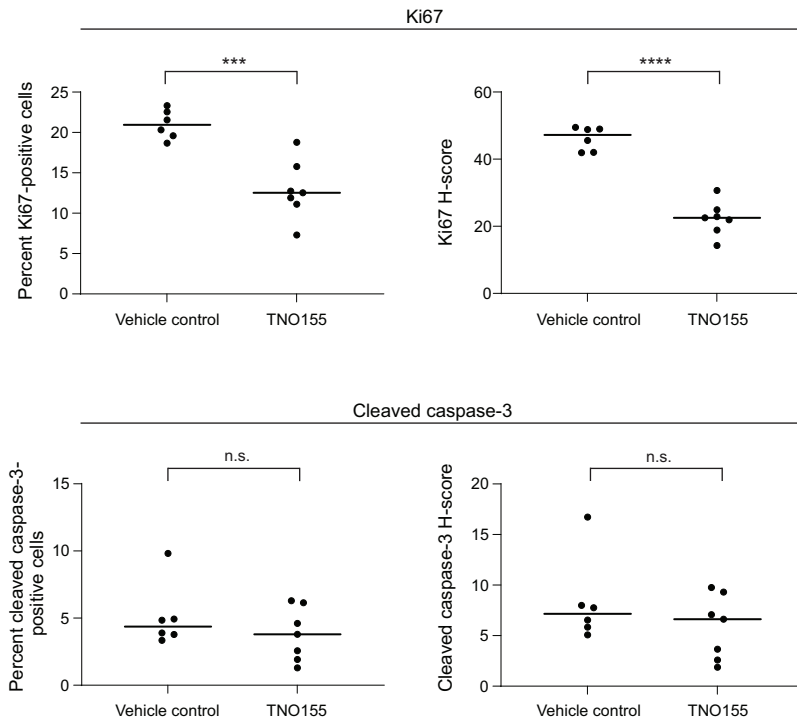**b**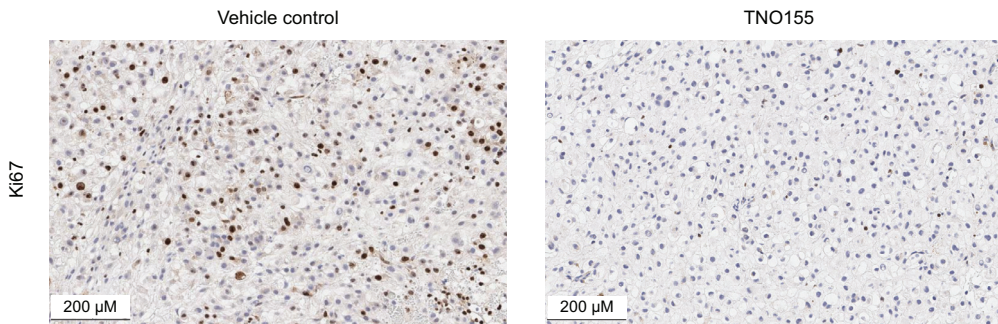**Supplementary Fig. 14. TNO155 treatment reduces tumor proliferation in the CF539 PDX model of chordoma.**

Immunohistochemical staining for Ki67 expression, a marker of cellular proliferation, or cleaved caspase-3 expression, a marker of apoptosis, using terminal tumor tissue from the CF539 experiment depicted in Fig. 5d (treatment with vehicle control bid or 10 mg/kg TNO155 bid). Tumor tissue was collected 2 h post-treatment for all mice, except for one vehicle-treated mouse whose tissue was collected 4 h post-treatment. **a** Quantification of Ki67- or cleaved caspase-3-positivity (top and bottom, respectively), by percentage of positive cells (left) or histochemical score (H-score; right), of tumor tissue collected from vehicle-treated ( $n = 6$ ) and TNO155-treated ( $n = 7$ ) mice and stained for Ki67 or cleaved caspase-3 expression. Horizontal lines indicate the median. n.s., not significant, \*\*\* $P < 0.001$ , \*\*\*\* $P < 0.0001$ , derived from a two-tailed, unpaired  $t$  test. Additional details of  $P$  values and effect sizes are reported in Supplementary Data 7. **b** Example images of tumor tissue collected from vehicle- or TNO155-treated mice and stained for Ki67 expression. Source data are provided as a Source Data file.

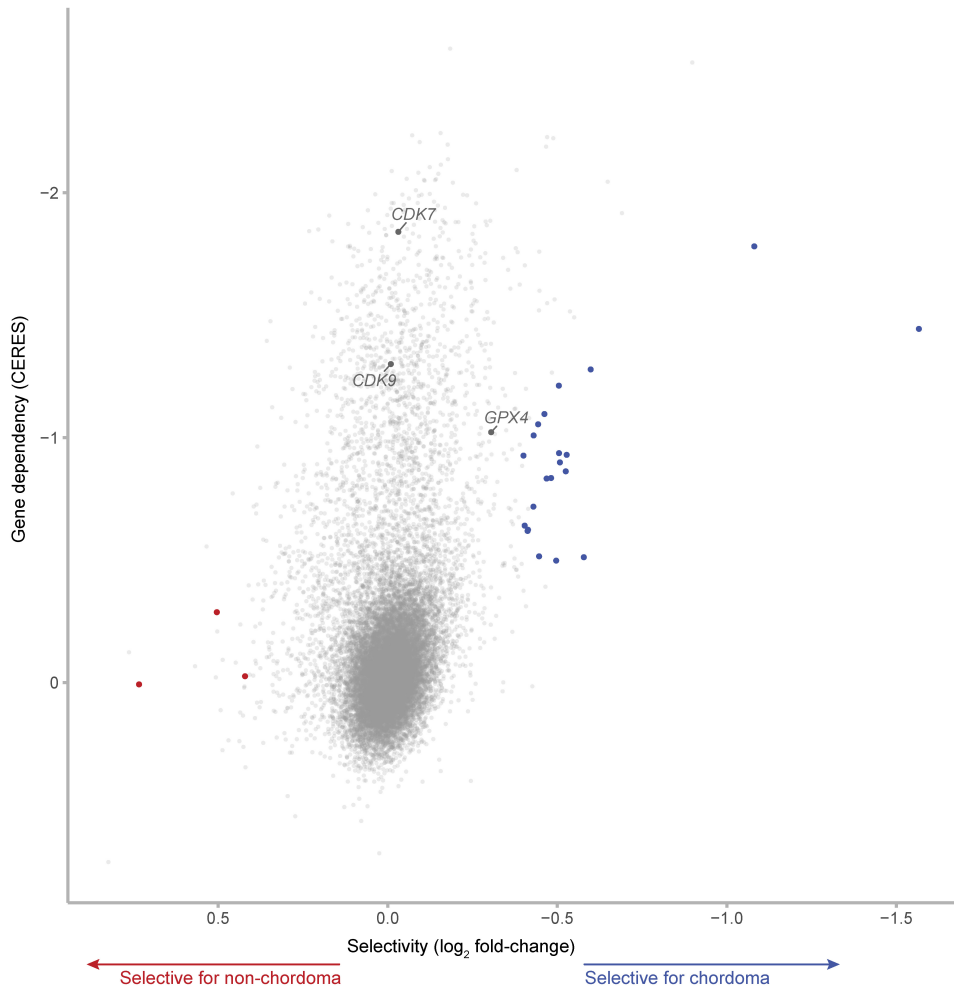

**Supplementary Fig. 15. Genetic essentiality of known small-molecule dependencies in chordoma.** Plot depicted in Supplementary Fig. 2, with positions of *CDK7*, *CDK9*, and *GPX4* indicated (dark gray). These genes encode proteins against which small-molecule inhibition was previously shown to have antiproliferative effects in chordoma models<sup>5</sup>. See also related Supplementary Data 2.

| <b>Cell line</b> | <b>Original location of disease</b> | <b>Disease status</b> | <b>Age</b> |
|------------------|-------------------------------------|-----------------------|------------|
| JHC7             | Sacral                              | Primary               | 61         |
| U-CH2            | Sacral                              | Recurrent             | 72         |
| MUG-Chor1        | Sacral                              | Recurrent             | 57         |
| UM-Chor1         | Clival                              | Primary               | 66         |

**Supplementary Table 1. Characteristics of chordoma cell lines used for genome-scale CRISPR-Cas9 screens.** Chordoma cell lines used for genome-scale CRISPR-Cas9 screens, and the clinical characteristics associated with the originating tumors (source: [www.chordomafoundation.org](http://www.chordomafoundation.org)).

| Location      | Primer sequence (5' to 3') |
|---------------|----------------------------|
| sg-ADAR-1-F   | AGAGGCCAGACCAGAACCAGCA     |
| sg-ADAR-1-R   | GCCCGCTGATGGGGTTCTTCAG     |
| sg-ADAR-2-F   | GGTCAGGAAGATTGGCGAGCTCG    |
| sg-ADAR-2-R   | TCCCTCAACTCGCCCCCTTCTGT    |
| sg-CDK6-1-F   | AGGGCGCCTATGGGAAGGTGTT     |
| sg-CDK6-1-R   | TTCTGGGCCTGAGGATTCCCGG     |
| sg-CDK6-2-F   | CATGGAGAAGGACGGCCTGTGC     |
| sg-CDK6-2-R   | CACGTTGGGGTGCTCGAAGGTC     |
| sg-FANCM-1-F  | CCCTACCAATTGCCAGTGCGG      |
| sg-FANCM-1-R  | TTTCGGCCATGTGGGATTGCGG     |
| sg-FANCM-2-F  | TGTGGCAAGATCATCCTTTGCCT    |
| sg-FANCM-2-R  | GGCAGAAAACCTATTCTTTACTGAGA |
| sg-LUC7L2-1-F | CCTTCCAGAGAATGGATCTTG      |
| sg-LUC7L2-1-R | CTTACCCTTCATATAACCAGAGG    |
| sg-LUC7L2-2-F | AGGGAATGTGGAGGAATCCCAGA    |
| sg-LUC7L2-2-R | ACGCACCACCACAACCAGCTTT     |
| sg-PRKRA-1-F  | CGTCGGTGCGGTTAAAACCTGG     |
| sg-PRKRA-1-R  | TGAAGGTGAAAGTGGGCACGTGT    |
| sg-PRKRA-2-F  | TGGCATGCAAAGCACACCTTTT     |
| sg-PRKRA-2-R  | TGACTGCCAACCCACTCGGTCA     |
| sg-PTPN11-1-F | AGCCTGAGCAAGGAGCGGGT       |
| sg-PTPN11-1-R | GGCAGGAAATGAATGGGGAC       |
| sg-PTPN11-2-F | CCCCTTGCCTCCCTTTCCAATGG    |
| sg-PTPN11-2-R | GGCACAAGGGAGCAGCAGACTT     |
| sg-SLC2A1-1-F | AACCTGCTCCCAGACACGCCTA     |
| sg-SLC2A1-1-R | TCAGGTGGTGCGTGAGACTGT      |
| sg-SLC2A1-2-F | AAGGAAGACTGGGTCCTGGCCC     |
| sg-SLC2A1-2-R | ACCGGCCAAAGCGGTTAACGAA     |
| sg-SLC7A5-1-F | GGAGAAGATGCTGGCCGCCAAG     |
| sg-SLC7A5-1-R | TTGGAGATGGTGGTCCCGAGCT     |
| sg-SLC7A5-2-F | GAGAAGGAAGAGGCGCGGGAGA     |
| sg-SLC7A5-2-R | CACGATGGAGAAGACGCCGCAC     |
| sg-SOX9-1-F   | GAACACGTTCCCCAAGGGCGAG     |
| sg-SOX9-1-R   | GTGCAAGTGCGGGTACTGGTCC     |
| sg-SOX9-2-F   | AGGAAGCCGAGTGGTCTGGGTC     |
| sg-SOX9-2-R   | TCTTCACCGACTTCTCCGCCG      |
| sg-SRRM2-1-F  | ACCAAGACGAGGAAGATCCCGCA    |
| sg-SRRM2-1-R  | GCTGCGCCTCAAAGACAAGCGA     |
| sg-SRRM2-2-F  | CTCCCCACAACCCCTTGCAACC     |
| sg-SRRM2-2-R  | ACCCTGGAGCTGGAGCAGGTTT     |
| sg-THAP1-1-F  | CTTGGAGATGGGAGACGGGCGA     |
| sg-THAP1-1-R  | CGGGCTTGCTTGTCTGTAGCG      |
| sg-THAP1-2-F  | GGCTGCAAGAACCGCTACGACA     |
| sg-THAP1-2-R  | TGTTCCAGGAGCGCGAGAAACG     |

Supplementary Table 2. Primer sequences associated with amplicon sequencing experiments.

## Supplementary Information References

- 1 Xu, J. *et al.* The Role of Transcriptional Factor Brachyury on Cell Cycle Regulation in Non-small Cell Lung Cancer. *Front Oncol* **10**, 1078, doi:10.3389/fonc.2020.01078 (2020).
- 2 Liberzon, A. *et al.* The Molecular Signatures Database (MSigDB) hallmark gene set collection. *Cell Syst* **1**, 417-425, doi:10.1016/j.cels.2015.12.004 (2015).
- 3 Liu, H. *et al.* Tumor-derived IFN triggers chronic pathway agonism and sensitivity to ADAR loss. *Nat Med* **25**, 95-102, doi:10.1038/s41591-018-0302-5 (2019).
- 4 Dempster, J. M. *et al.* Chronos: a CRISPR cell population dynamics model. *bioRxiv*, 2021.2002.2025.432728, doi:10.1101/2021.02.25.432728 (2021).
- 5 Sharifnia, T. *et al.* Small-molecule targeting of brachyury transcription factor addiction in chordoma. *Nat Med* **25**, 292-300, doi:10.1038/s41591-018-0312-3 (2019).



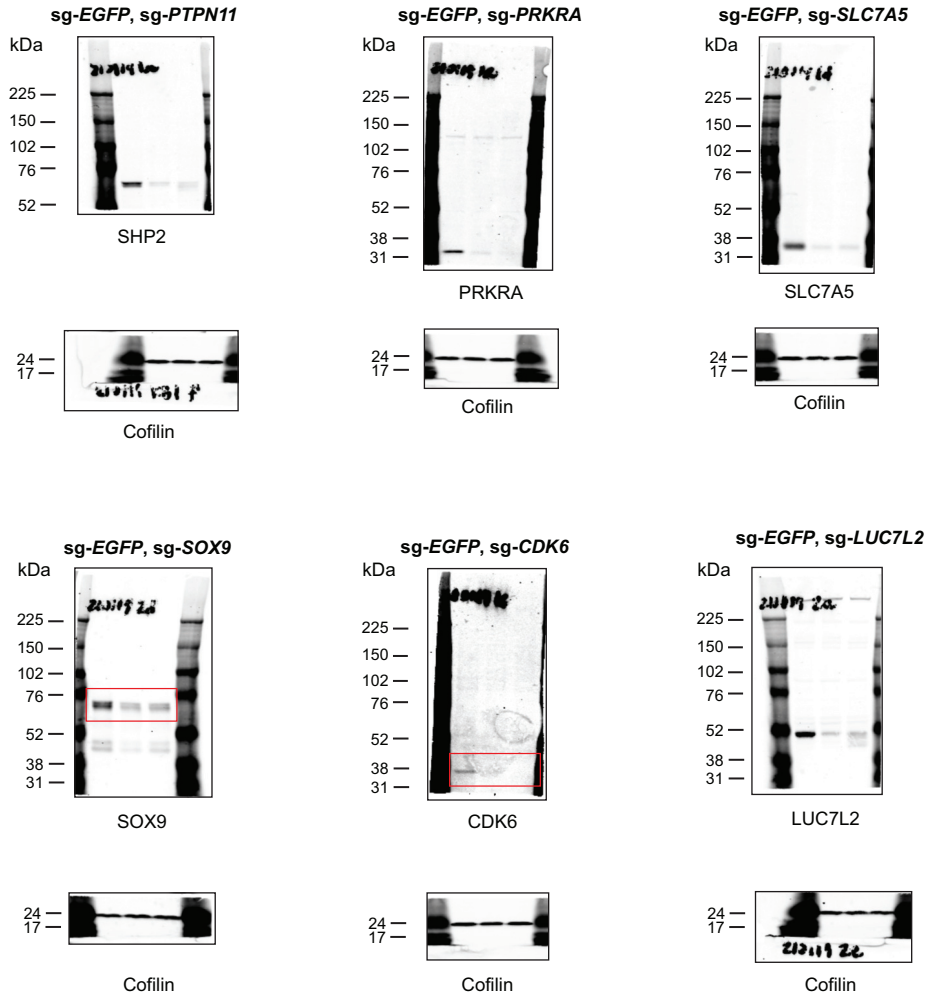

Uncropped immunoblots associated with Supplementary Fig. 4.

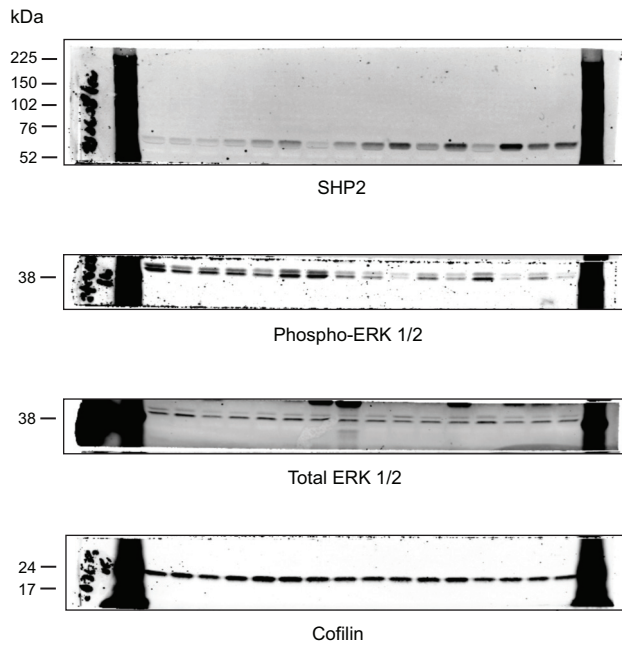

Uncropped immunoblots associated with Supplementary Fig. 11.
